# Supplementary material for: Outcomes among Newborns with Total Serum Bilirubin Levels of 25 mg per Deciliter or More
Source: Atypon-hosted journal article supplement (doi:10.1056/nejmoa054244), 2006-05-03
Supplement: nejm_newman_1889sa1.pdf [file nejm_newman_1889sa1.pdf]

## Supplementary Appendix

This appendix has been provided by the authors to give readers additional information about their work.

Supplement to: Newman TB, Liljestrand P, Jeremy RJ, et al. Outcomes among newborns with total serum bilirubin levels of 25 mg per deciliter or more. *N Engl J Med* 2006;354:1889-900.

**WEB-ONLY Table: Covariates for Adjusted WPPSI-R and VMI-4 Scores (Table 3)**

| <b>Outcome</b>                 | <b>Covariates</b>                                                                                                                                                                                |
|--------------------------------|--------------------------------------------------------------------------------------------------------------------------------------------------------------------------------------------------|
| WPPSI-R Verbal IQ              | Father's race (including birth certificate data); family income (7 categories*); subject sex; father any college (yes/no)                                                                        |
| WPPSI-R Performance IQ         | CESD† total $\geq$ 16 (yes/no); father's race (including birth certificate data); father any college (yes/no)                                                                                    |
| WPPSI-R Full Scale IQ          | Father's race (including birth certificate data); father any college (yes/no); family income (7 categories)                                                                                      |
| VMI-4 Visual-Motor Integration | Father's race (including birth certificate data); father any college (yes/no)                                                                                                                    |
| VMI-4 Visual Perception        | Father's race (including birth certificate data); father any college (yes/no)                                                                                                                    |
| VMI-4 Motor Coordination       | Examining psychologist; family income (7 categories); father's race (including birth certificate data); father any college (yes/no); exclusively breastfed during birth hospitalization (yes/no) |

\*The 7 income categories were:

- Less than \$15,000
- \$15,000 to less than \$20,000
- \$20,000 to less than \$40,000
- \$40,000 to less than \$60,000
- \$60,000 to less than \$80,000
- \$80,000 to less than \$100,000
- \$100,000 or more

† CESD = Center for Epidemiologic Studies Depression Scale. This scale ranges includes 20 questions scored 0 to 3 points each, hence the range of possible responses is from 0 to 60. A score of 16 or more is usually considered positive for depression.

**WEB-ONLY Table: Covariates for Neurological Examination, Motor Performance Checklist, Parent Evaluation of Developmental Status (PEDS) and Child Behavior Checklist (CBC-L) Outcomes (Table 4)**

| <b>Outcome</b>                                              | <b>Covariates</b>                                                                                                                |
|-------------------------------------------------------------|----------------------------------------------------------------------------------------------------------------------------------|
| “Normal/questionable” or worse                              | Examining neurologist; father any college (yes/no)                                                                               |
| “Abnormal with minimal disability” or worse                 | Father any college (yes/no)                                                                                                      |
| Motor Performance Checklist, Score $\geq 5$                 | CESD total $\geq 16$ (yes/no); small (less than the tenth percentile) for gestational age (yes/no)*; father any college (yes/no) |
| PEDS Questionnaire, at least one “YES” answer               | CESD total $\geq 16$ (yes/no); father any college (yes/no); mother any college (yes/no)                                          |
| Internalizing preclinical or clinical T-score ( $\geq 60$ ) | CESD total $\geq 16$ (yes/no); father's race (including birth certificate data)                                                  |
| Externalizing preclinical or clinical T-score ( $\geq 60$ ) | CESD total $\geq 16$ (yes/no)                                                                                                    |
| Outpatient follow-up to at least age 2                      | Father's race (including birth certificate data); father any college (yes/no)                                                    |
| At least one neurological diagnosis                         | 5 min Apgar $< 7$                                                                                                                |

\* Defined based on the 10th percentile for the 1995-98 birth cohorts, shown in the table below:

| Gestational Age (completed weeks) | 10 <sup>th</sup> percentile of birth weight |
|-----------------------------------|---------------------------------------------|
| 34                                | 1765                                        |
| 35                                | 2015                                        |
| 36                                | 2290                                        |
| 37                                | 2500                                        |
| 38                                | 2709                                        |
| 39                                | 2903                                        |
| 40                                | 3019                                        |
| 41                                | 3163                                        |
| 42                                | 3235                                        |
| 43                                | 3295                                        |
